## COMMENTS AND RESPONSES

### Novel Noninvasive Breath Test Method for Screening Individuals at Risk for Diabetes

Response to Dillon et al.

I wish to propose consideration of another explanation for the recent results noted with [ $^{13}\text{C}$ ] glucose in subjects with pre- and early-stage diabetes (1). These individuals had significantly higher fasting glucose concentrations than those in the control group, which would have led to lower specific activities of [ $^{13}\text{C}$ ]glucose 1–3 h into the oral glucose tolerance test. This lowered specific activity would result in decreased  $^{13}\text{CO}_2$  excretion by the lungs. This explana-

tion is supported by many studies from ~15 years ago that showed that the decreased glucose uptake during clamps in subjects with diabetes and impaired glucose tolerance was secondary to decreased glucose “storage” rather than changes in glucose oxidation (2–5).

MAYER B. DAVIDSON, MD

From the Clinical Center for Research Excellence,  
Charles R. Drew University, Los Angeles,  
California.

Corresponding author: Mayer B. Davidson,  
mayerdavidson@cdrewu.edu.

DOI: 10.2337/dc09-0518

© 2009 by the American Diabetes Association.

Readers may use this article as long as the work is properly cited, the use is educational and not for profit, and the work is not altered. See <http://creativecommons.org/licenses/by-nc-nd/3.0/> for details.

**Acknowledgments**—No potential conflicts of interest relevant to this article were reported.

#### References

1. Dillon EL, Janghorbani M, Angel JA, Casperson SL, Grady JJ, Urban RJ, Volpi

E, Sheffield-Moore M. Novel noninvasive breath test method for screening individuals at risk for diabetes. *Diabetes Care* 2009;32:430–435

2. Eriksson J, Korany L, Bourey R, Schalin-Jääntti C, Widén E, Mueckler M, Permutt AM, Groop LC. Insulin resistance in type 2 (non-insulin-dependent) diabetic patients and their relatives is not associated with a defect in the expression of the insulin-responsive glucose transporter (GLUT-4) gene in human skeletal muscle. *Diabetologia* 1992;35:143–147
3. Shulman GJ, Rothman DL, Jue T, Stein P, DeFronzo RA, Shulman RG. Quantification of muscle glycogen synthesis in normal subjects and subjects with non-insulin-dependent diabetes by  $^{13}\text{C}$  nuclear magnetic resonance spectroscopy. *N Engl J Med* 1990;322:223–228
4. Kelley DE, Mokan M, Mandarino LJ. Metabolic pathways of glucose in skeletal muscle of lean NIDDM patients. *Diabetes Care* 1993;16:1158–1166
5. Vestergaard H, Lund S, Larsen FS, Bjerrum OJ, Pedersen O. Glycogen synthase and phosphofructokinase protein and mRNA levels in skeletal muscle from insulin-resistant patients with non-insulin-dependent diabetes mellitus. *J Clin Invest* 1993;91:2342–2350
